# Supplementary material for: Intercomparison study and optical asphericity measurements of small ice particles in the CERN CLOUD experiment
Source: Copernicus journal article supplement (doi:10.5194/amt-2016-205), 2016-08-03
Supplement: Supplementary file 1 [file amt-2016-205-supplement.pdf]

1 **Supplementary materials**

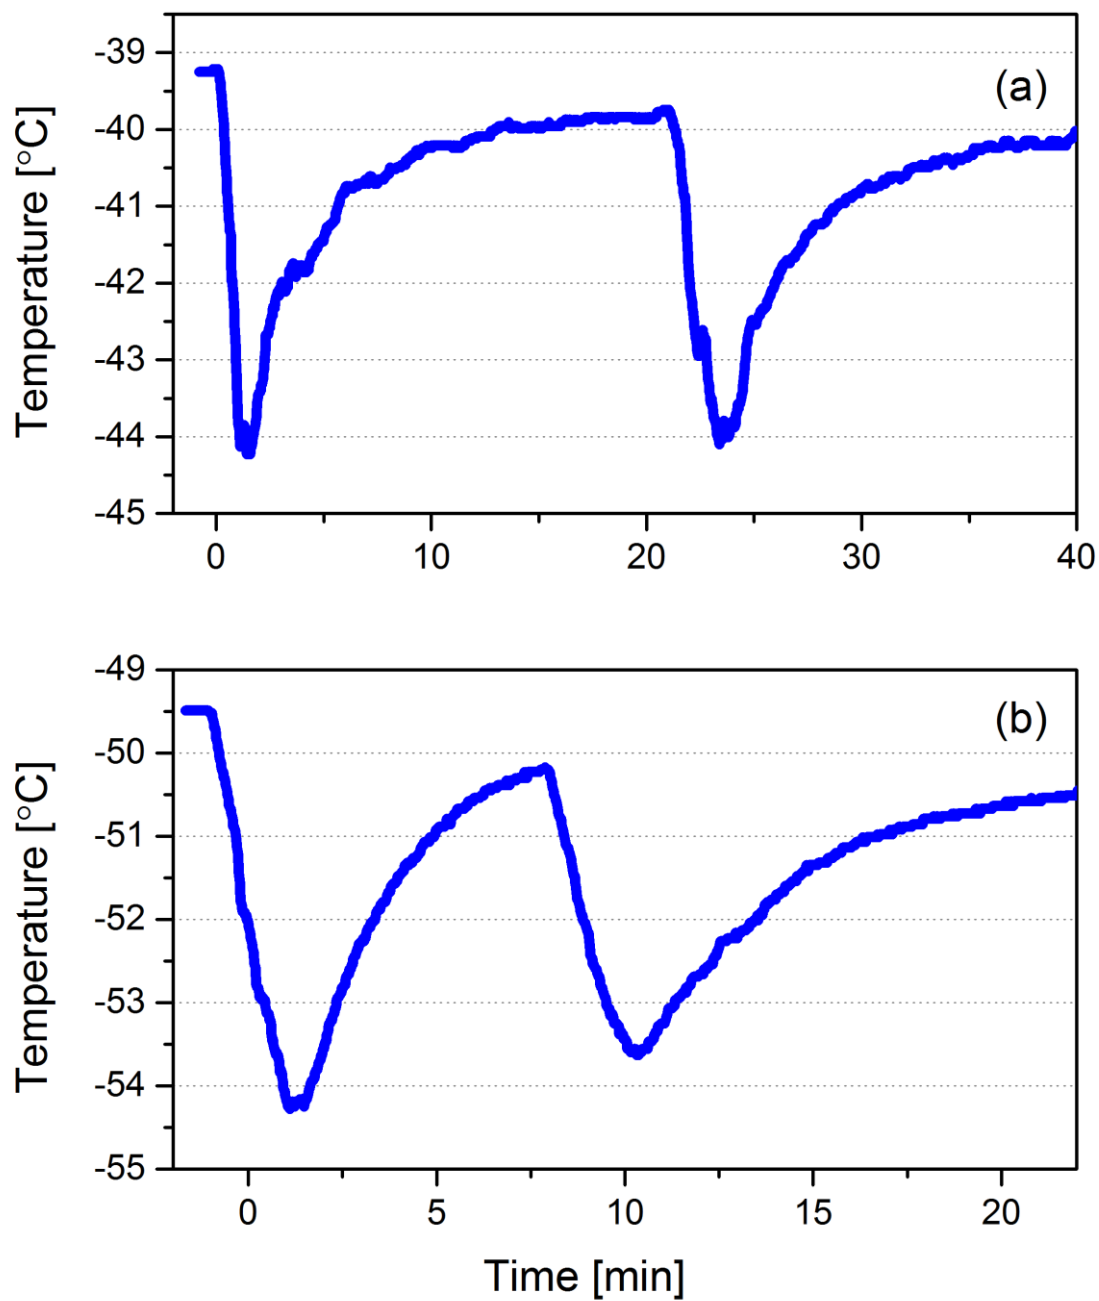

2

3 Figure S1. Temperature profiles. (a) Run no. 1276.05 (-40 °C), (b) Run no. 1298.12 (-50  
4 °C).

5

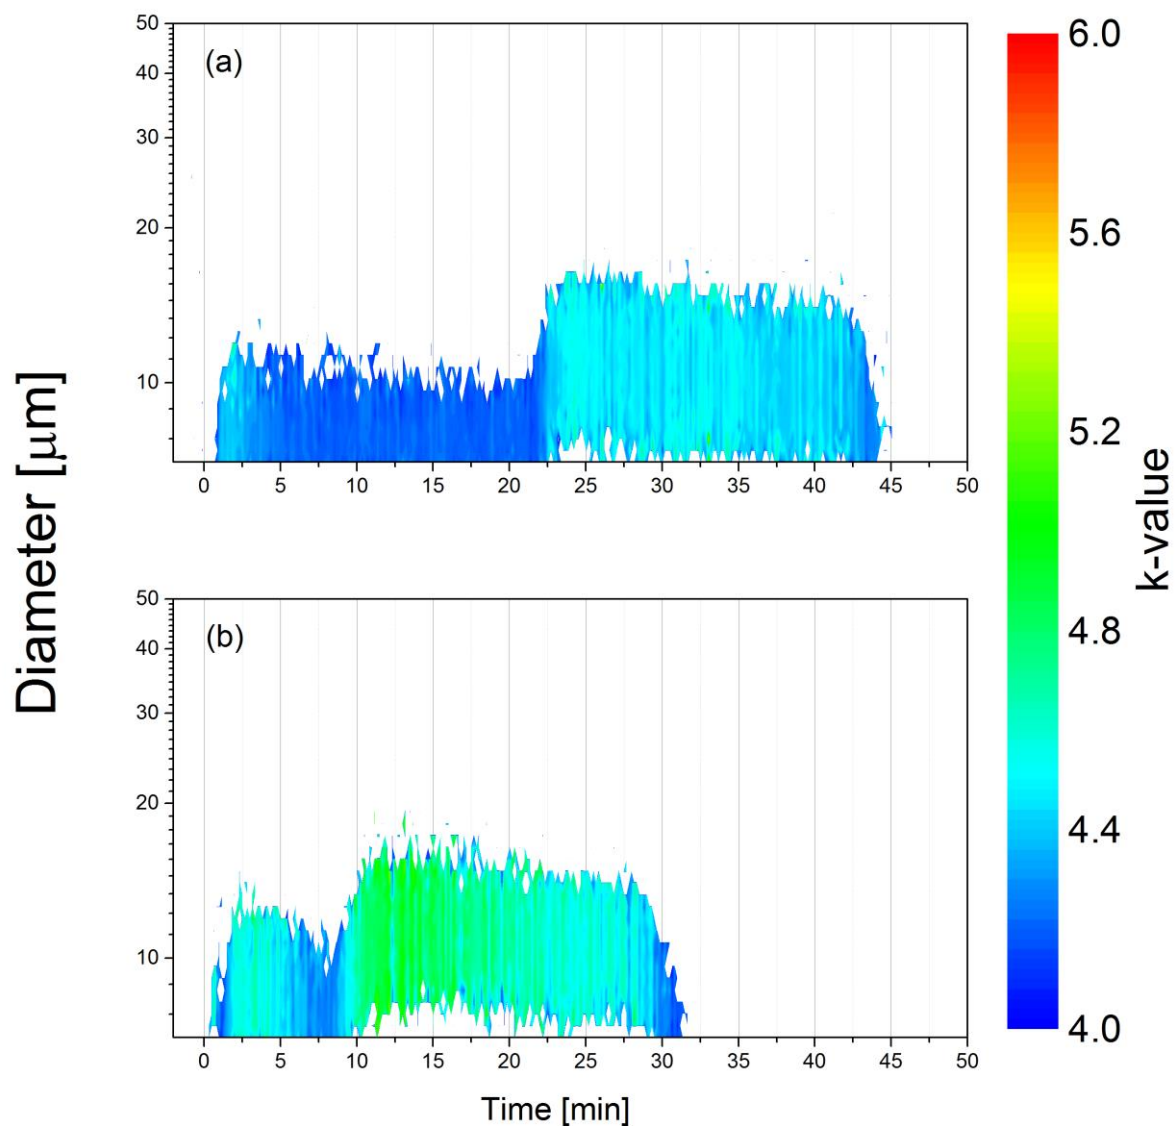

1

2 Figure S2. Evolution of small-scale complexity represented by the size-segregated k-value  
 3 (complexity parameter (Schaniter et al., 2016)). (a) Run no. 1276.05 ( $-40\text{ }^\circ\text{C}$ ), (b) Run no.  
 4 1298.12 ( $-50\text{ }^\circ\text{C}$ ).
