# Supplementary material for: Intercomparison study and optical asphericity measurements of small ice particles in the CERN CLOUD experiment
Source: Copernicus journal article supplement (doi:10.5194/amt-2016-205), 2016-08-03
Supplement: Supplementary file [file amt-2016-205-AC1-supplement.zip]

## 1 Supplementary material

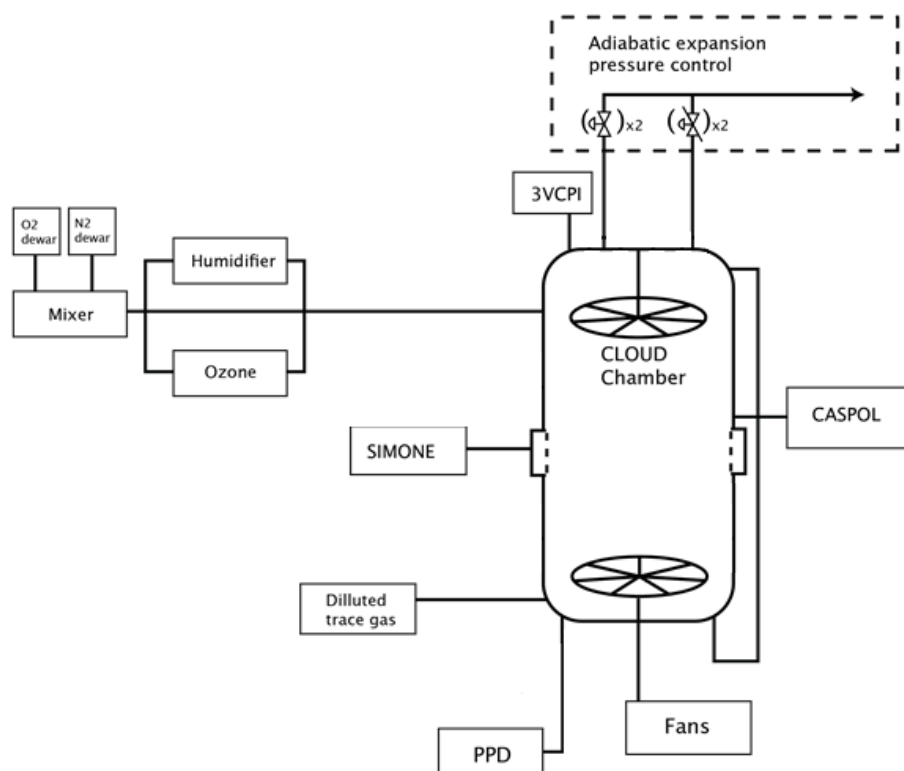

2

3 Figure S1. Simplified diagram of the CLOUD chamber and the sampling instruments.
